# Supplementary material for: The Impact of Gene Duplication, Insertion, Deletion, Lateral Gene Transfer and Sequencing Error on Orthology Inference: A Simulation Study
Source: PubMed Central journal article supplement (PMC3581572; doi:10.1371/journal.pone.0056925), 2013-02-25
Supplement: pone.0056925.s001.pdf [file pone.0056925.s001.pdf]

## Supplementary figures

## The Impact of Gene Duplication, Insertion, Deletion, Lateral Gene Transfer and Sequencing Error on Orthology Inference — A Simulation Study

Dalquen et al.

## Species Trees

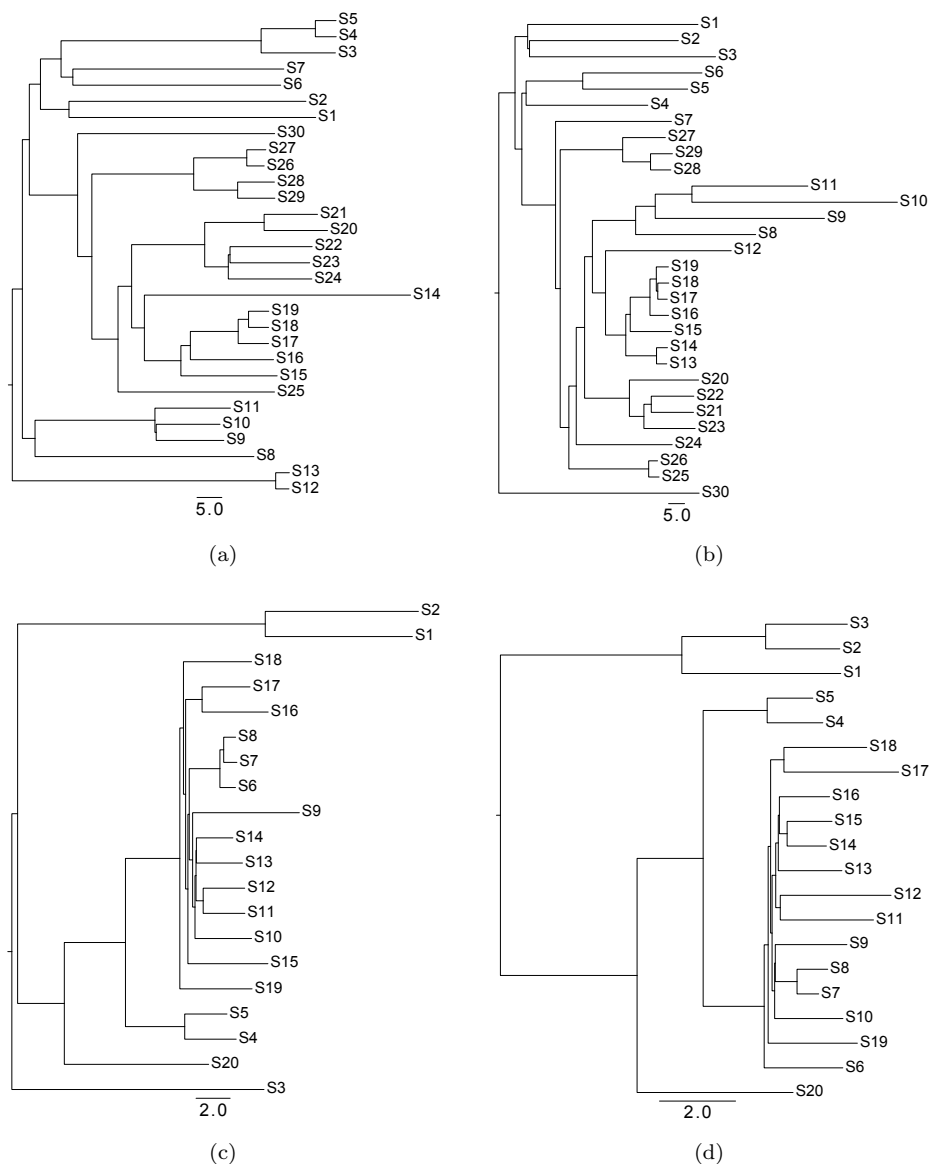

**SFigure 1.** The species trees used in the simulations.(a)-(b): sampled from bacteria tree; (c)-(d): sampled from mammalia tree.

## Gene Tree

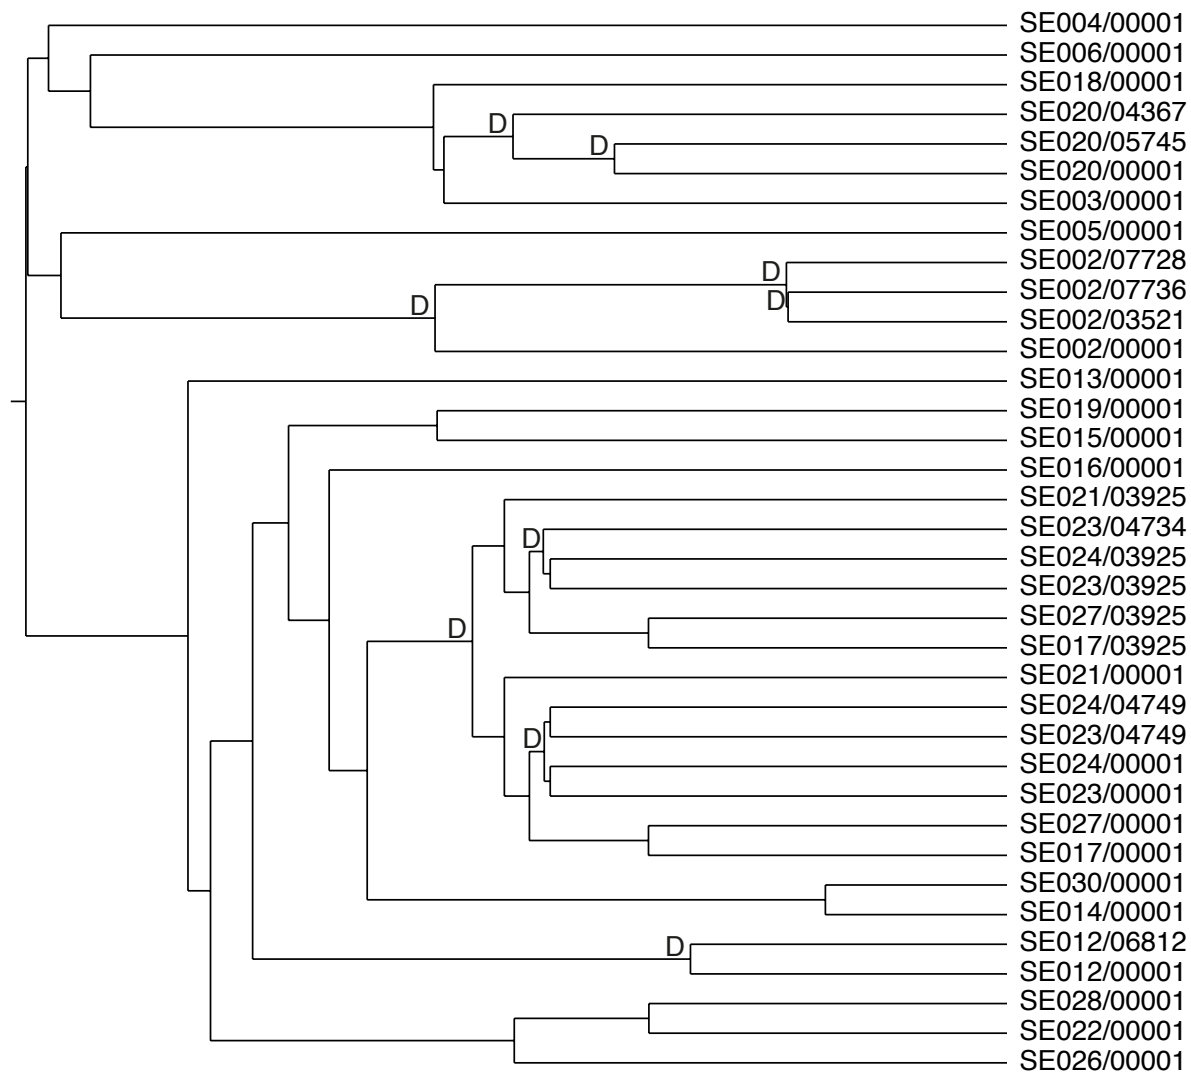

**Figure 2.** Example gene tree of a gene family with duplications.

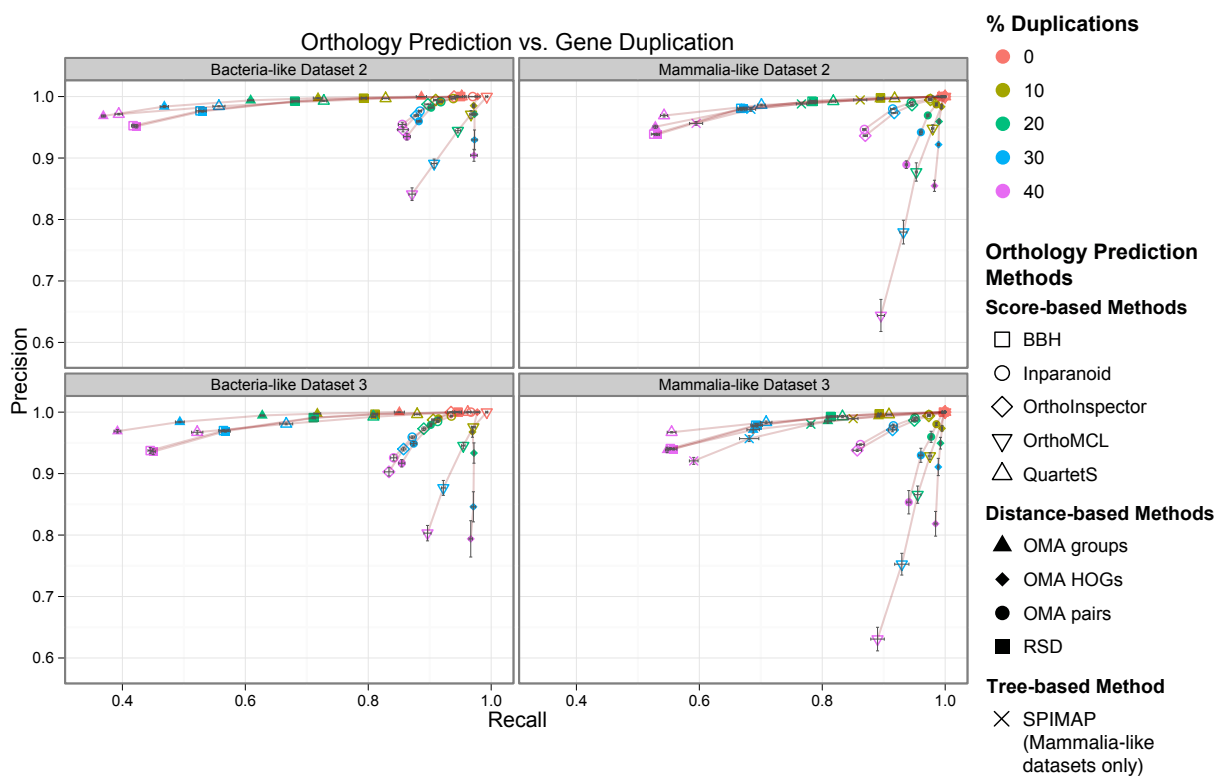

**SFigure 3.** Results for different proportions of duplications in the replicates not shown in the main article.

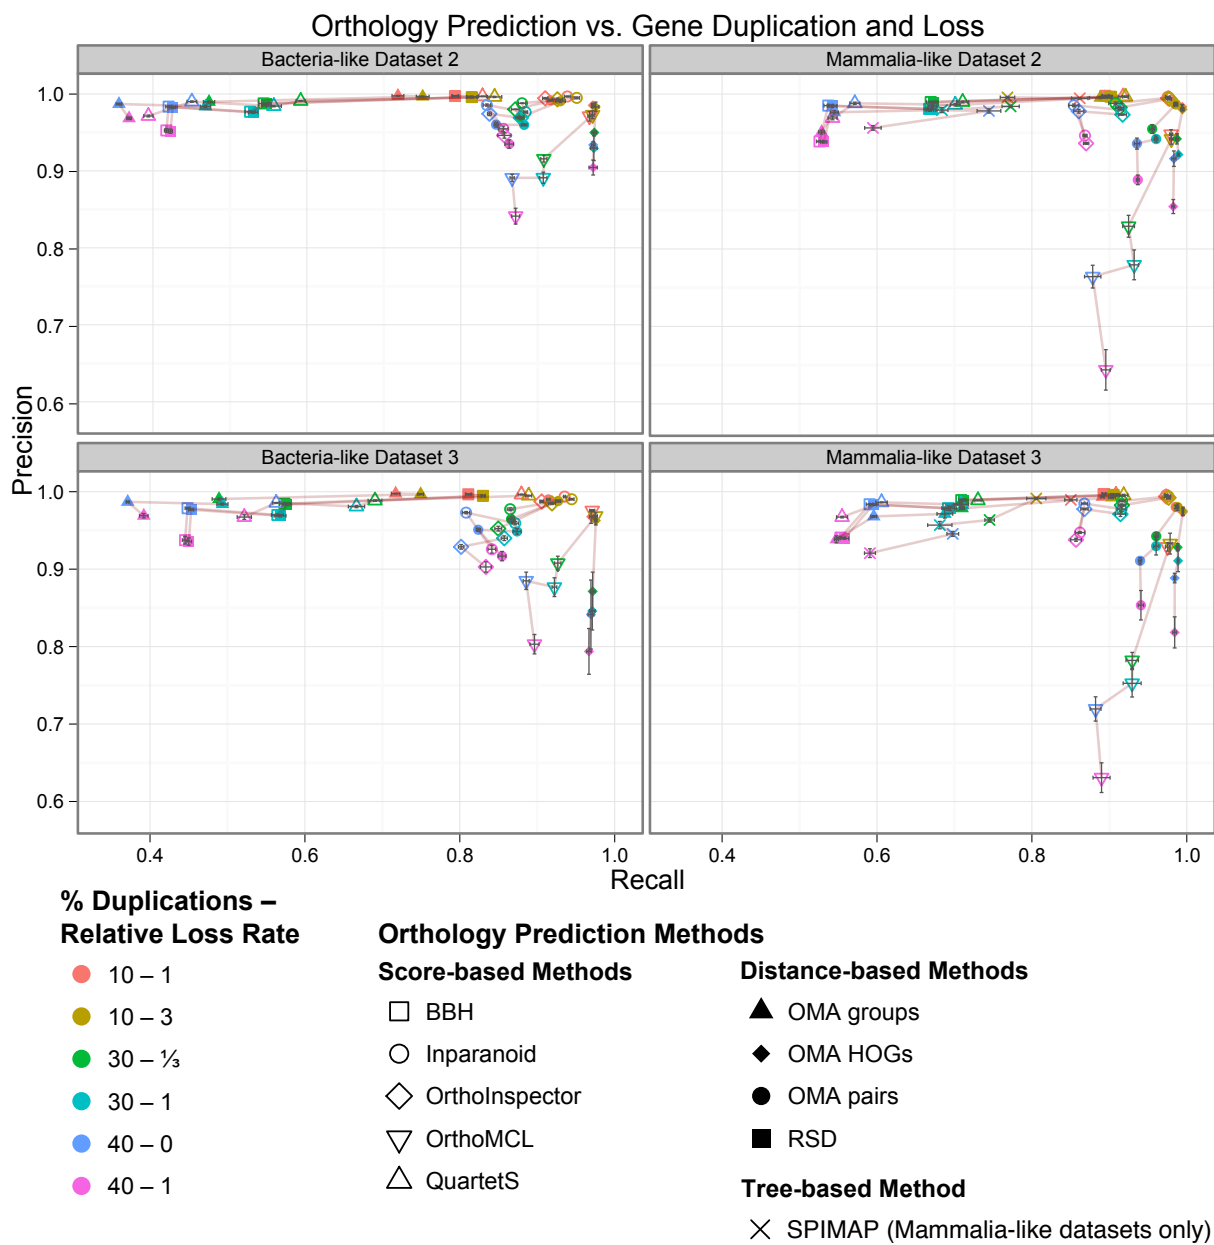

**SFigure 4.** Results for different proportions of duplications with varying relative loss rates in the replicates not shown in the main article.

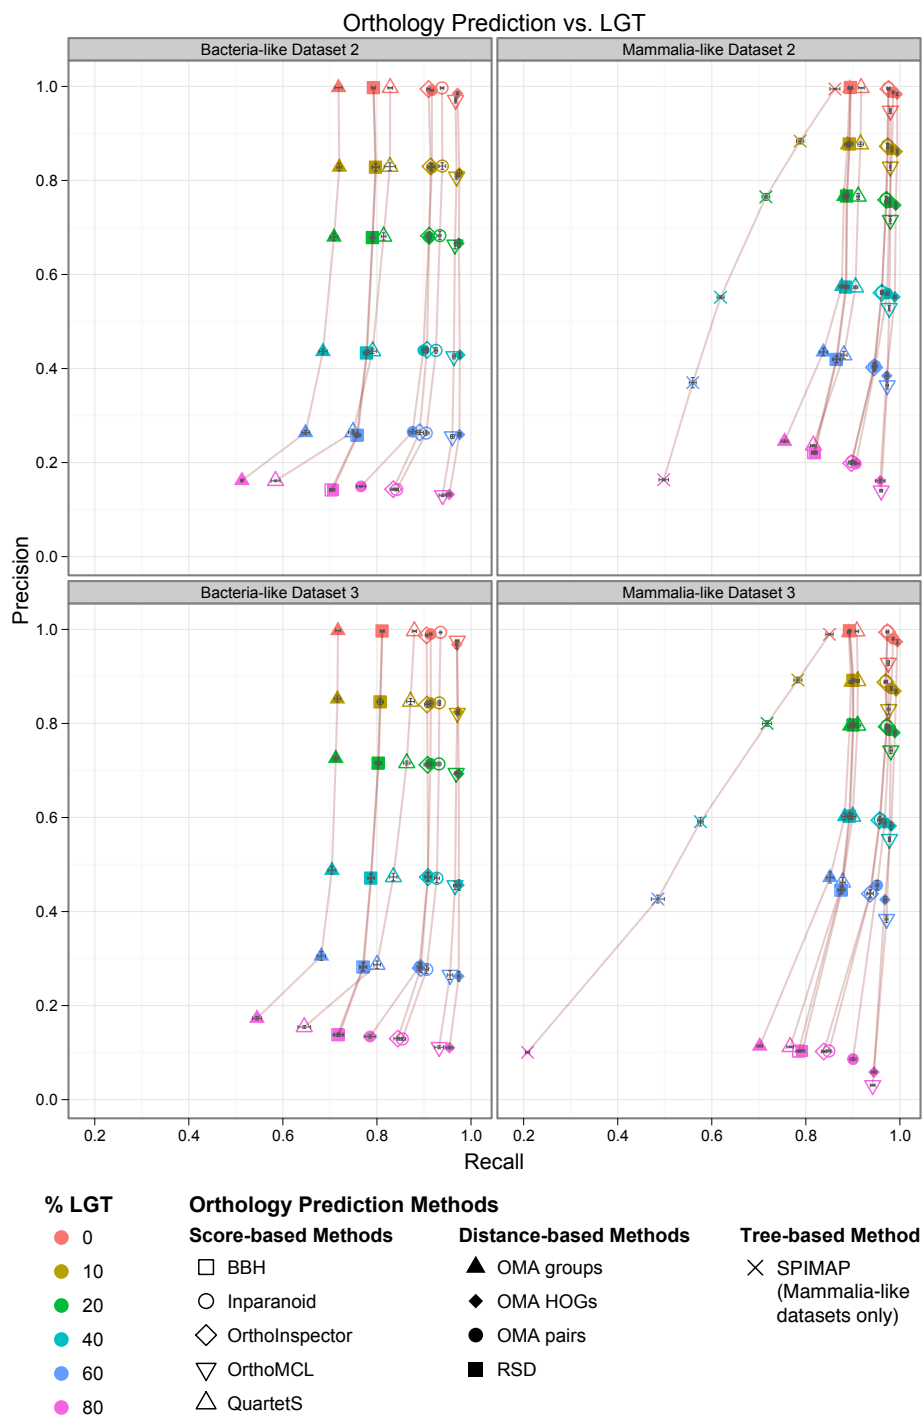

**Figure 5.** Results for different proportions of LGT in the replicates not shown in the main article.

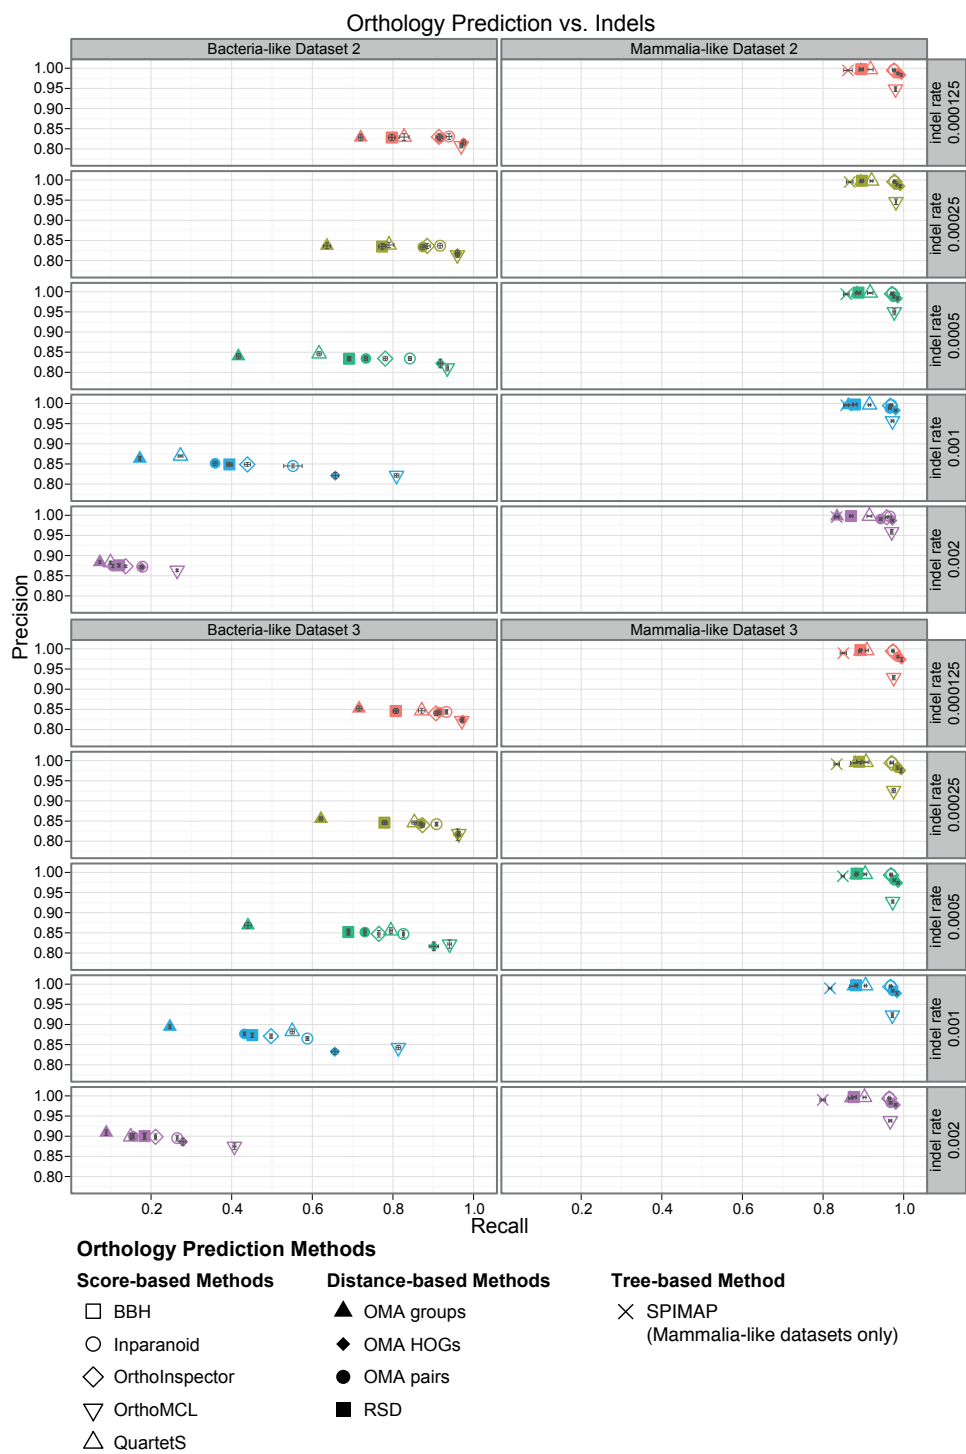

**SFigure 6.** Results for different insertion and deletion rates.

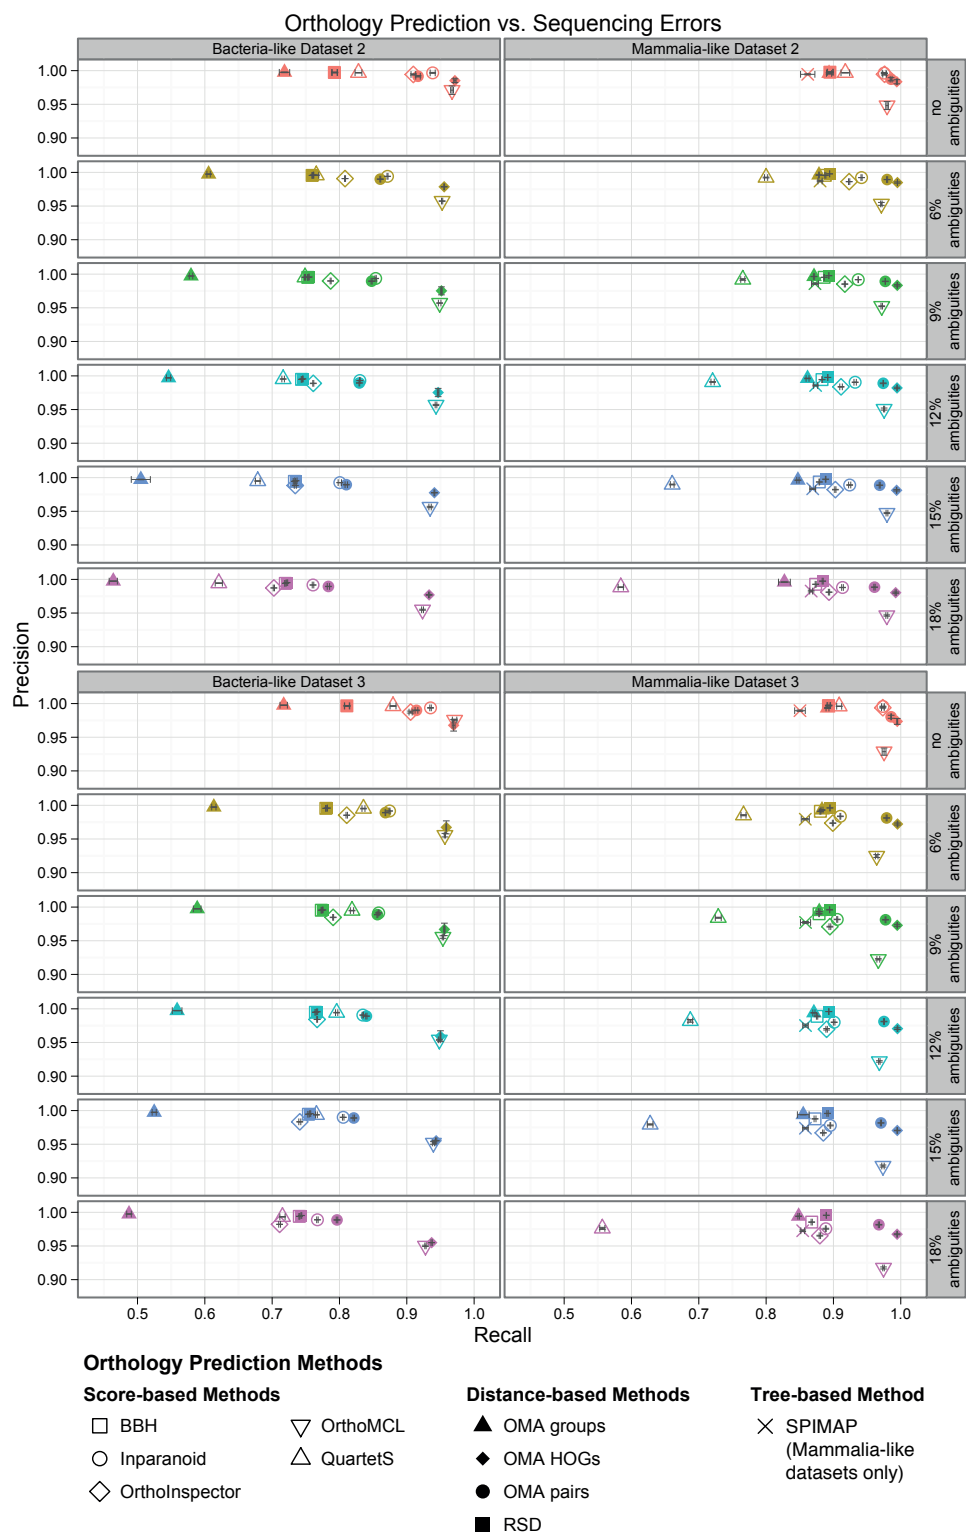

**Figure 7.** Results for different proportions of ambiguous characters.

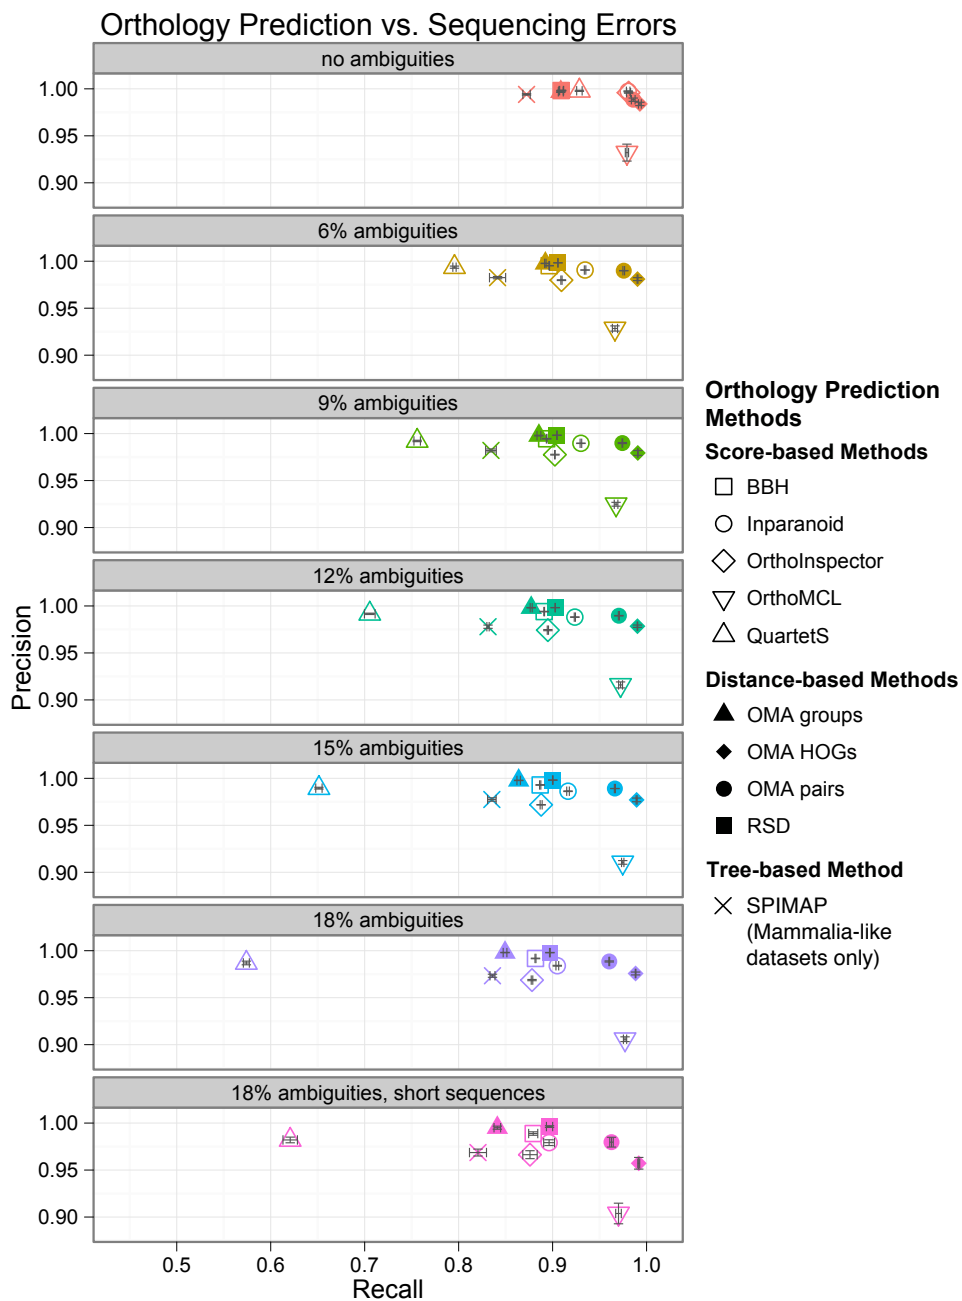

**Figure 8.** Results for different proportions of ambiguous characters for mammalia-like dataset 1. We investigated the impact of sequence length on the inference result of QuartetS by creating datasets with shorter sequences (bottom box).
